# Supplementary material for: Neural encoding of task-dependent errors during adaptive learning
Source: eLife journal article supplement (doi:10.7554/elife.58809), 2020-10-19
Supplement: supp [file elife-58809-supp-v1.zip]

Error vs Correct

Error magnitude

Noisy

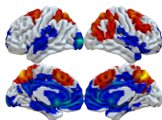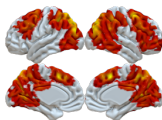

Unstable

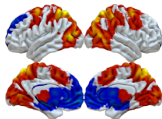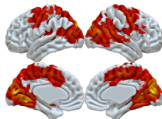

Noisy  
&  
Unstable

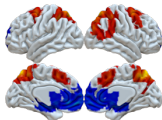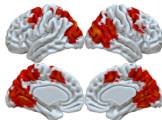

Noisy  
>  
Unstable

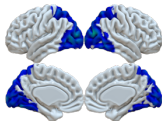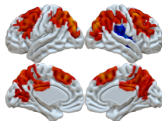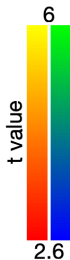

Positive Negative
