# Supplementary material for: Neural encoding of task-dependent errors during adaptive learning
Source: eLife journal article supplement (doi:10.7554/elife.58809), 2020-10-19
Supplement: supp [file elife-58809-supp-v1.zip]

**A**

Cluster-forming threshold: TFCE

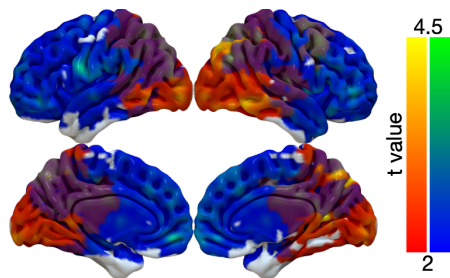Cluster-forming threshold:  $p < 0.001$ 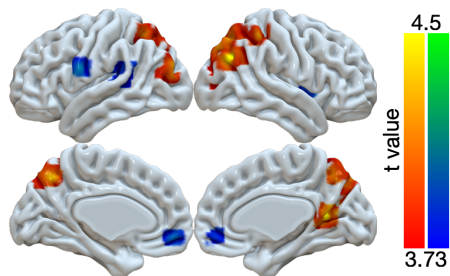

- Error magnitude on the current trial
- Switch vs stay on the next trial

**B**

Cluster-forming threshold: TFCE

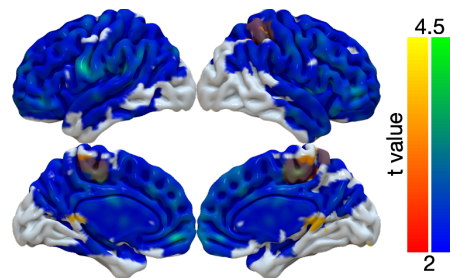Cluster-forming threshold:  $p < 0.001$ 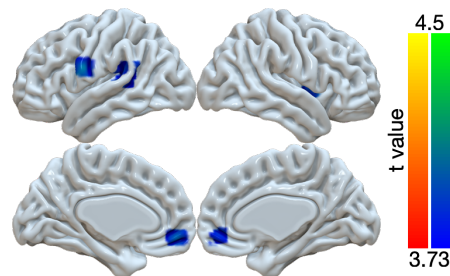

- Past error conditional on error magnitude of 1 or 2 on the current trial
- Switch vs stay on the next trial
