# Supplementary material for: Neural encoding of task-dependent errors during adaptive learning
Source: eLife journal article supplement (doi:10.7554/elife.58809), 2020-10-19
Supplement: supp [file elife-58809-supp-v1.zip]

# “Error vs Correct” on the previous trial

All  
feedback

Correct  
feedback

Error  
feedback

Error magnitude  
0 or 3+

Error magnitude  
1 or 2

Noisy

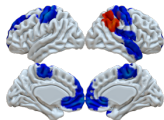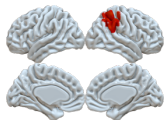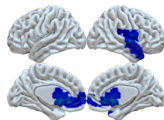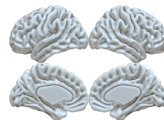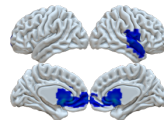

Unstable

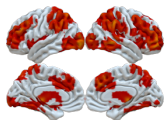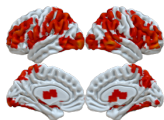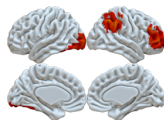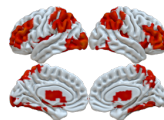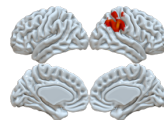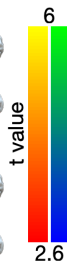

Noisy  
&  
Unstable

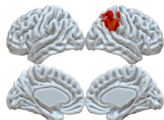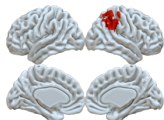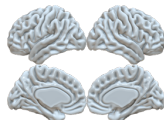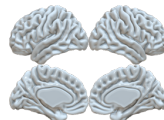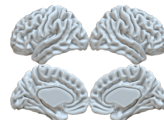

Noisy  
>  
Unstable

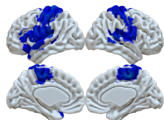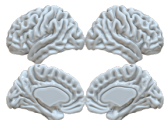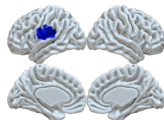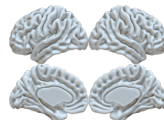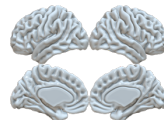

Positive Negative
