# Supplementary figures and images for: Neural encoding of task-dependent errors during adaptive learning
Source: eLife journal article supplement (doi:10.7554/elife.58809), 2020-10-19

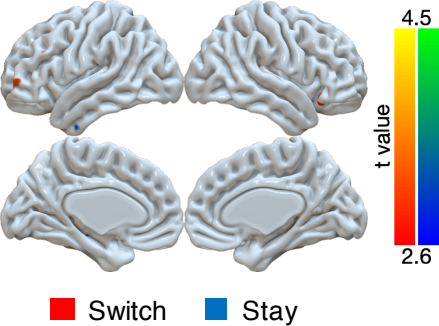

Supplement: supp [file elife-58809-supp-v1.zip]

**A**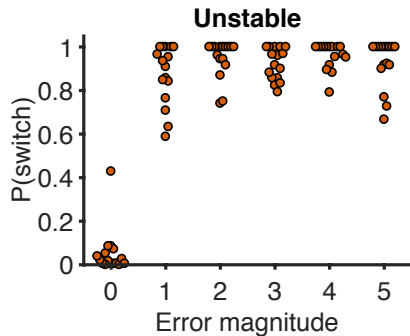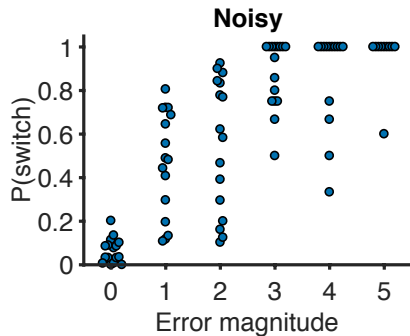**B**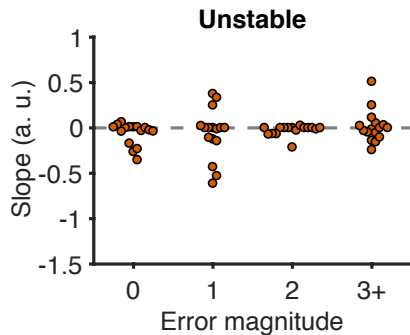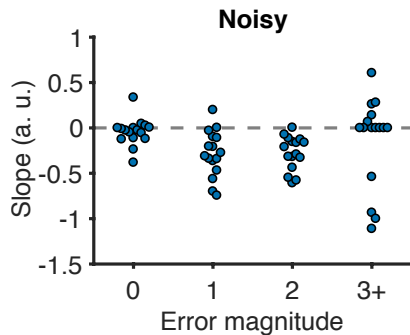

Supplement: supp [file elife-58809-supp-v1.zip]

**A**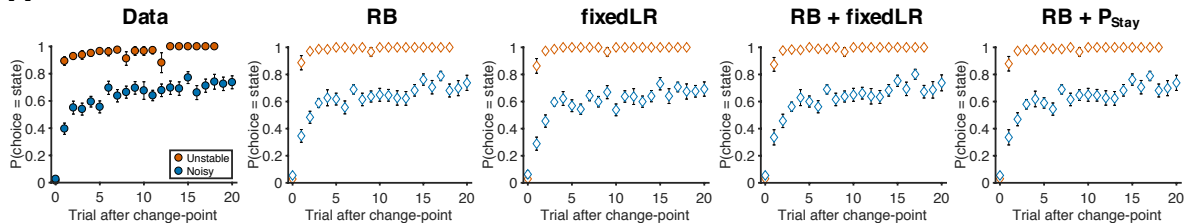**B**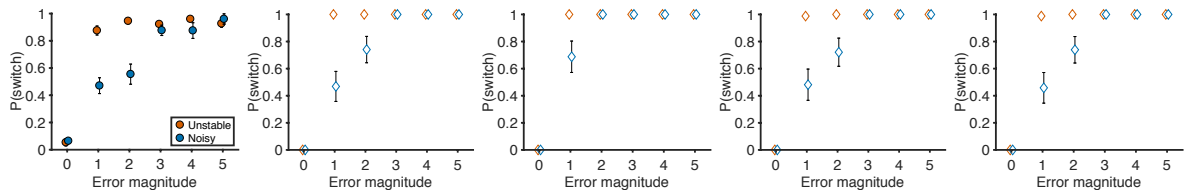**C**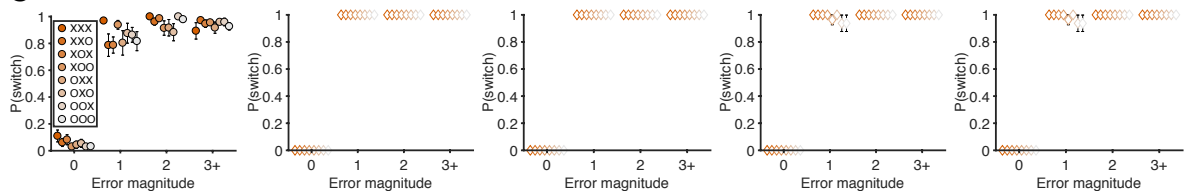**D**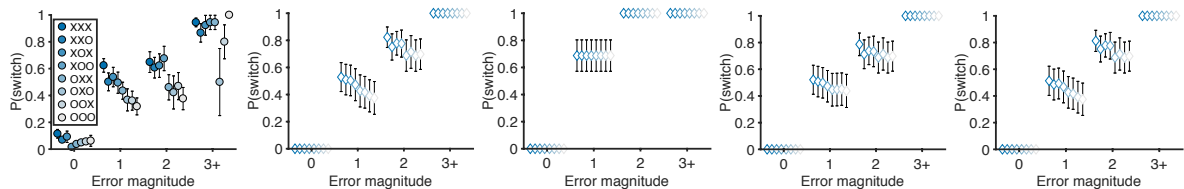

Supplement: supp [file elife-58809-supp-v1.zip]

**A**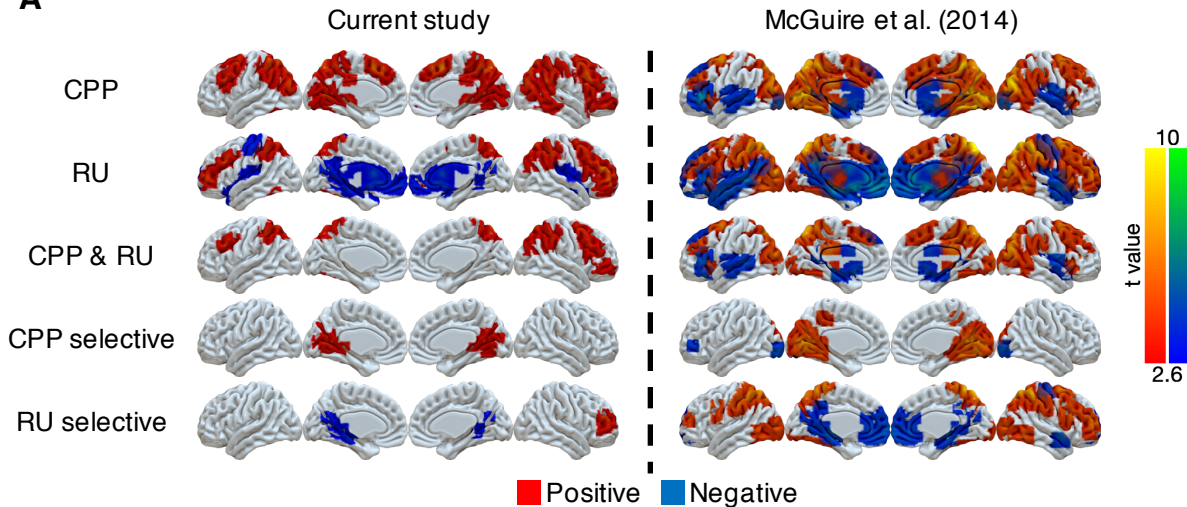**B**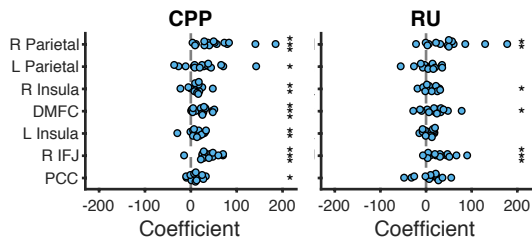

Supplement: supp [file elife-58809-supp-v1.zip]

**A**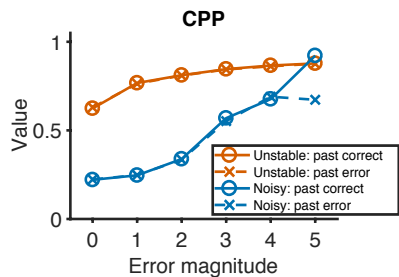**B**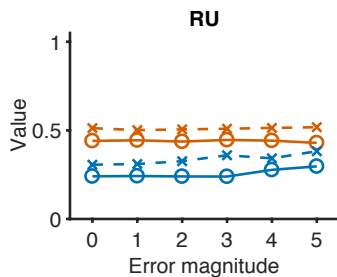**C**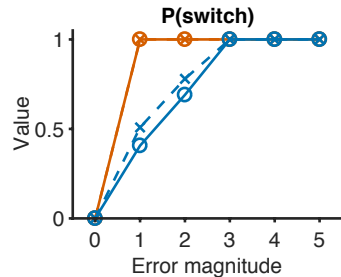**D**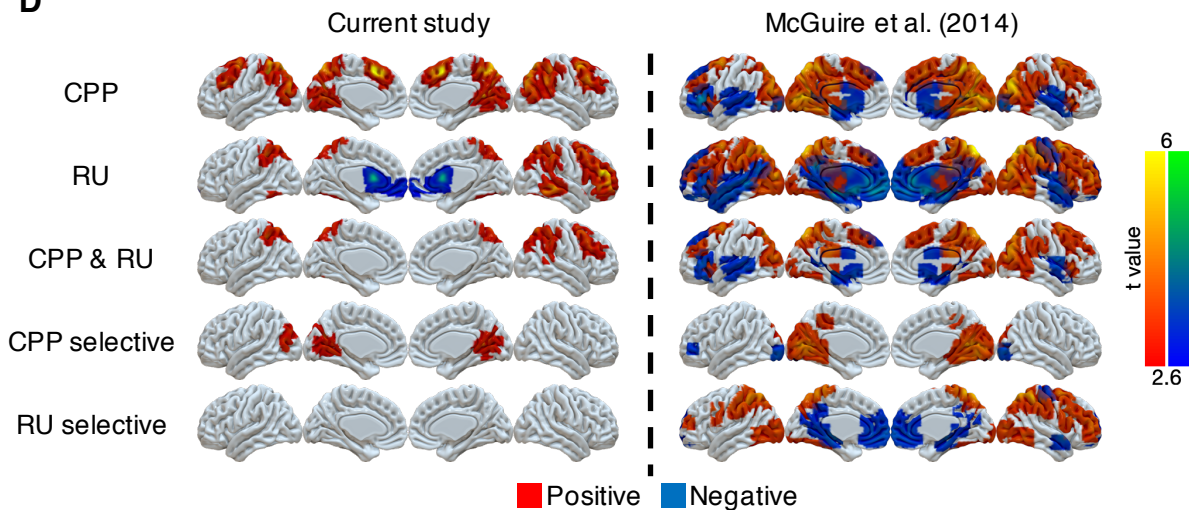**E**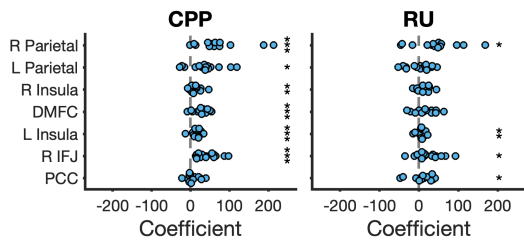

Supplement: supp [file elife-58809-supp-v1.zip]
